# Supplementary material for: Frequency of signs of chronic gastrointestinal disease in dogs after an episode of acute hemorrhagic diarrhea
Source: PubMed Central journal article supplement — J Vet Intern Med. 2021 Dec 10;36(1):59–65. doi: 10.1111/jvim.16312 (PMC8783318; doi:10.1111/jvim.16312), 2021-12-10
Supplement: JVIM-36-59-s001.pdf [file JVIM-36-59-s001.pdf]

## GI-Related Questions

Chronic gastrointestinal symptoms were defined as clinical signs lasting longer than three weeks, recurrent symptoms lasting longer than three days or symptoms which will not improve without therapy. The following questions refer to the episodes with chronic gastrointestinal symptoms. If the severity of symptoms varies, the questions referred to the episodes with the most severe clinical signs.

|                                                                                                 |    |
|-------------------------------------------------------------------------------------------------|----|
| 1. Does your dog suffer from chronic GI clinical signs?                                         |    |
| Yes                                                                                             | No |
| 2. How often does your dog suffer from GI clinical signs?                                       |    |
| Always                                                                                          |    |
| Recurrent                                                                                       |    |
| - Mean durations of episodes                                                                    |    |
| - Frequency of episodes                                                                         |    |
| Once (from ... to ...)                                                                          |    |
| 3. Did the chronic clinical signs occur after an episode of bloody diarrhea for the first time? |    |
| Yes                                                                                             | No |
| 4. How is/was your dog's activity?                                                              |    |
| Normal                                                                                          |    |
| Mildly reduced                                                                                  |    |
| Moderately reduced                                                                              |    |
| Severely reduced                                                                                |    |
| 5. How is/was your dog's appetite?                                                              |    |
| Normal                                                                                          |    |
| Mildly reduced                                                                                  |    |
| Moderately reduced                                                                              |    |
| Severely reduced                                                                                |    |
| 6. How often does your dog vomit?                                                               |    |
| 1x/week                                                                                         |    |
| 2-3x/week                                                                                       |    |
| >3x/week                                                                                        |    |
| <1x/month                                                                                       |    |
| 7. How is/was your dog's stool consistency?                                                     |    |
| Normal                                                                                          |    |
| Moist                                                                                           |    |
| Very moist (soggy)                                                                              |    |
| Watery                                                                                          |    |
| 8. How is/was your dog's frequency of defecation?                                               |    |
| Normal                                                                                          |    |
| 2-3x/day or with mucous/ bloody coverage                                                        |    |
| 4-5x/day                                                                                        |    |
| >5x/day                                                                                         |    |
| 9. Does/did your dog show signs of weight loss?                                                 |    |
| No                                                                                              |    |
| <5%                                                                                             |    |
| 5-10%                                                                                           |    |
| >10%                                                                                            |    |

Questions 4-9 refer to the CIBDAI.
